# Supplementary material
Source: ML conference proceedings conference paper supplement (https://www.ecva.net/papers/eccv_2020/papers_ECCV/html/123600511_ECCV_2020_paper.php)
Supplement: Supplementary file 2 [file 123600511-supp.zip]

Archive with 8 entries (5 files):
- 2393-supp/
- 2393-supp/2393-supp.pdf
- 2393-supp/README.txt
- __MACOSX/
- __MACOSX/2393-supp/
- __MACOSX/2393-supp/._README.txt
- 2393-supp/2393-supp.mp4
- __MACOSX/2393-supp/._2393-supp.mp4
