# Supplementary material
Source: ML conference proceedings conference paper supplement (https://www.ecva.net/papers/eccv_2020/papers_ECCV/html/123600511_ECCV_2020_paper.php)
Supplement: Supplementary file 2 [file 123600511-supp.zip › 2393-supp/README.txt]

The codec for the supplementary video in MP4 format is MPEG4. URL to download the codec: https://www.windows10codecpack.com/ on windows or https://movist.en.softonic.com/mac on Mac.
